# Supplementary material for: Understanding the effects of surface reconstruction on the electrochemical cycling performance of the spinel LiNi0.5Mn1.5O4 cathode material at elevated temperatures
Source: Royal Society of Chemistry journal article supplement (doi:10.1039/c6ta08636e), 2016-11-28
Supplement: c6ta08636e1.pdf [file c6ta08636e1.pdf]

## Supplementary

### Understanding the Effects of Surface Reconstruction on Electrochemical Cycling Performance of Spinel $\text{LiNi}_{0.5}\text{Mn}_{1.5}\text{O}_4$ Cathode Material at Elevated Temperatures†

Hao Wang,<sup>‡a</sup>, Liubin Ben,<sup>‡a</sup> Hailong Yu,<sup>a</sup> Yuyang Chen,<sup>a</sup> Xinan Yang<sup>a</sup> and Xuejie Huang<sup>\*ab</sup>

<sup>a</sup> Beijing National Laboratory for Condensed Matter Physics, Institute of Physics, Chinese Academy of Science, Beijing 100190, China.

<sup>b</sup> School of Physical Sciences, University of Chinese Academy of Sciences, Beijing 100049, China.

\*E-mail: xjhuang@iphy.ac.cn

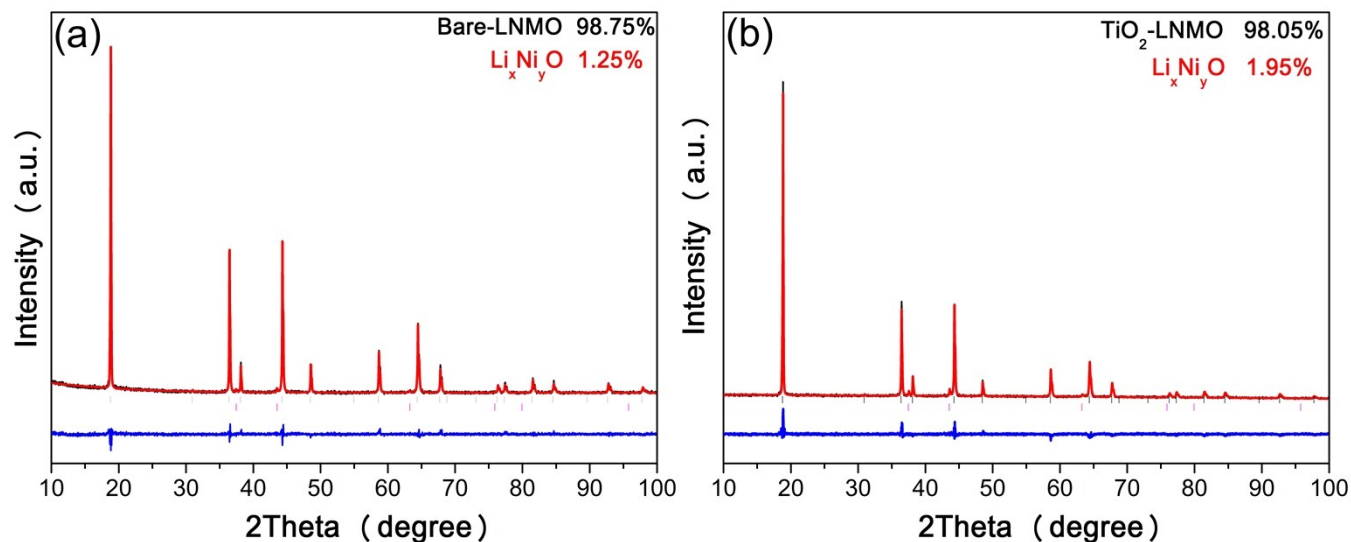

**Figure S1.** Rietveld refinement profiles using room-temperature XRD data for (a) Bare-LNMO sample refined in space group Fd-3m.  $wRp = 6.156\%$ ,  $Rp = 4.903\%$  and  $Gof = 1.201$ ; (b)  $TiO_2$ -LNMO refined in space group Fd-3m.  $wRp = 8.949\%$ ,  $Rp = 7.133\%$  and  $Gof = 1.294$ . Observed, calculated, and difference profiles shown in black, red, and blue, respectively; black and red tick marks show reflection positions for LNMO and  $Li_xNi_yO$ , respectively.

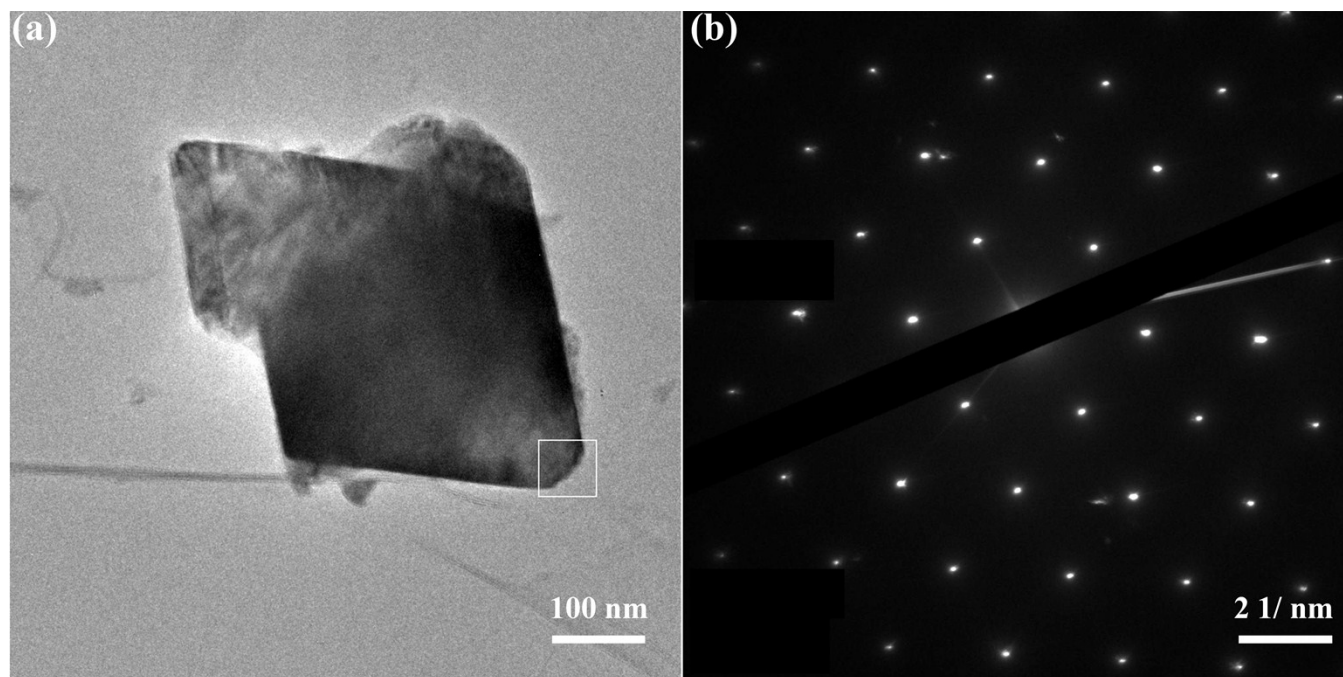

**Figure S1b.** (a) TEM bright-field image and (b) electron diffraction patterns in the [110] zone of  $TiO_2$ -LNMO

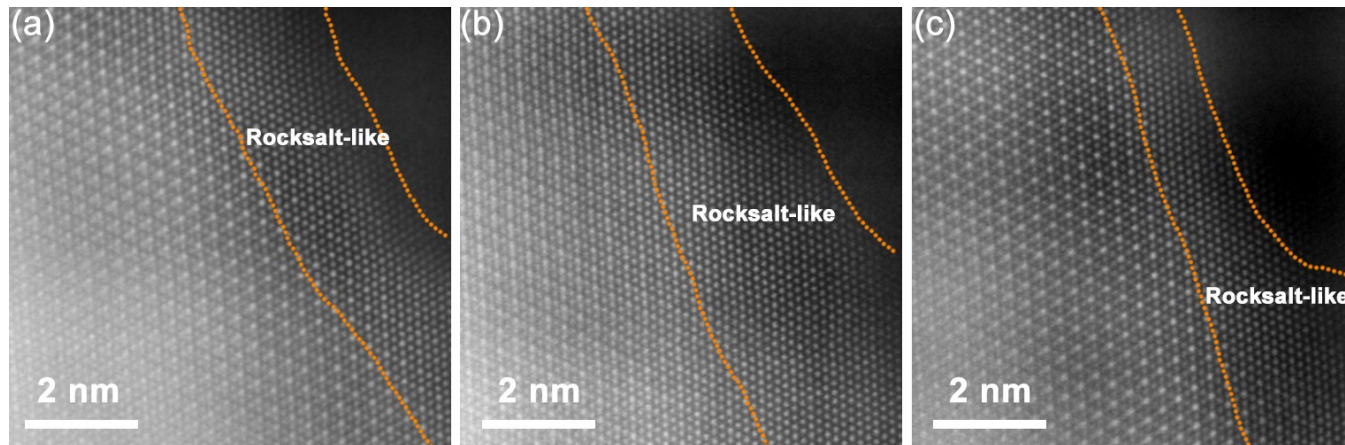

**Figure S2.** STEM HAADF images of TiO<sub>2</sub>-LNMO showing various extent of surface reconstructed structure.

|                | Mn <sup>4+</sup> |         |          |          |         |         |
|----------------|------------------|---------|----------|----------|---------|---------|
| Line Shape     | GL(30)           | GL(30)  | GL(30)   | GL(30)   | GL(30)  | GL(30)  |
| Area           | 39352.7          | 51345.9 | 30171.7  | 16677.7  | 8618.2  | 3935.3  |
| FWHM           | 1.09768          | 1.20648 | 1.14777  | 0.995472 | 1.09119 | 1.3     |
| Position       | 642.053          | 642.882 | 643.565  | 644.333  | 645.381 | 646.376 |
| %Concentration | 19.53            | 25.48   | 14.97    | 8.28     | 4.28    | 1.92    |
|                | Mn <sup>3+</sup> |         |          |          |         |         |
| Line Shape     | GL(30)           | GL(30)  | GL(30)   | GL(30)   | GL(30)  |         |
| Area           | 12345            | 12345   | 14299.6  | 9002     | 3446.7  |         |
| FWHM           | 1.13254          | 1.3     | 0.846851 | 1.17995  | 0.7     |         |
| Position       | 640.94           | 641.866 | 642.286  | 643.66   | 644.926 |         |
| %Concentration | 6.13             | 6.13    | 7.1      | 4.47     | 1.71    |         |

**Table S1a.** Mn(2p<sub>3/2</sub>) peak parameters for Mn in the Bare- LNMO.

|                | Mn <sup>4+</sup> |         |         |          |          |        |
|----------------|------------------|---------|---------|----------|----------|--------|
| Line Shape     | GL(30)           | GL(30)  | GL(30)  | GL(30)   | GL(30)   | GL(30) |
| Area           | 7855.7           | 10249.9 | 6023.0  | 3329.3   | 1720.4   | 1071.2 |
| FWHM           | 0.911326         | 1.3     | 1.15676 | 0.960127 | 0.987678 | 1.3    |
| Position       | 642.074          | 642.919 | 643.468 | 644.28   | 645.434  | 646.4  |
| %Concentration | 16.43            | 21.44   | 12.60   | 6.96     | 3.60     | 2.24   |
|                | Mn <sup>3+</sup> |         |         |          |          |        |
| Line Shape     | GL(30)           | GL(30)  | GL(30)  | GL(30)   | GL(30)   |        |
| Area           | 4213.7           | 4213.7  | 4880.9  | 3072.6   | 1176.5   |        |
| FWHM           | 1.3              | 1.19923 | 1.05842 | 1.29507  | 0.747367 |        |
| Position       | 640.927          | 641.739 | 642.45  | 643.663  | 644.876  |        |
| %Concentration | 8.81             | 8.81    | 10.21   | 6.43     | 2.46     |        |

**Table S1b.** Mn( $2p_{3/2}$ ) peak parameters for Mn in TiO<sub>2</sub>-LNMO.

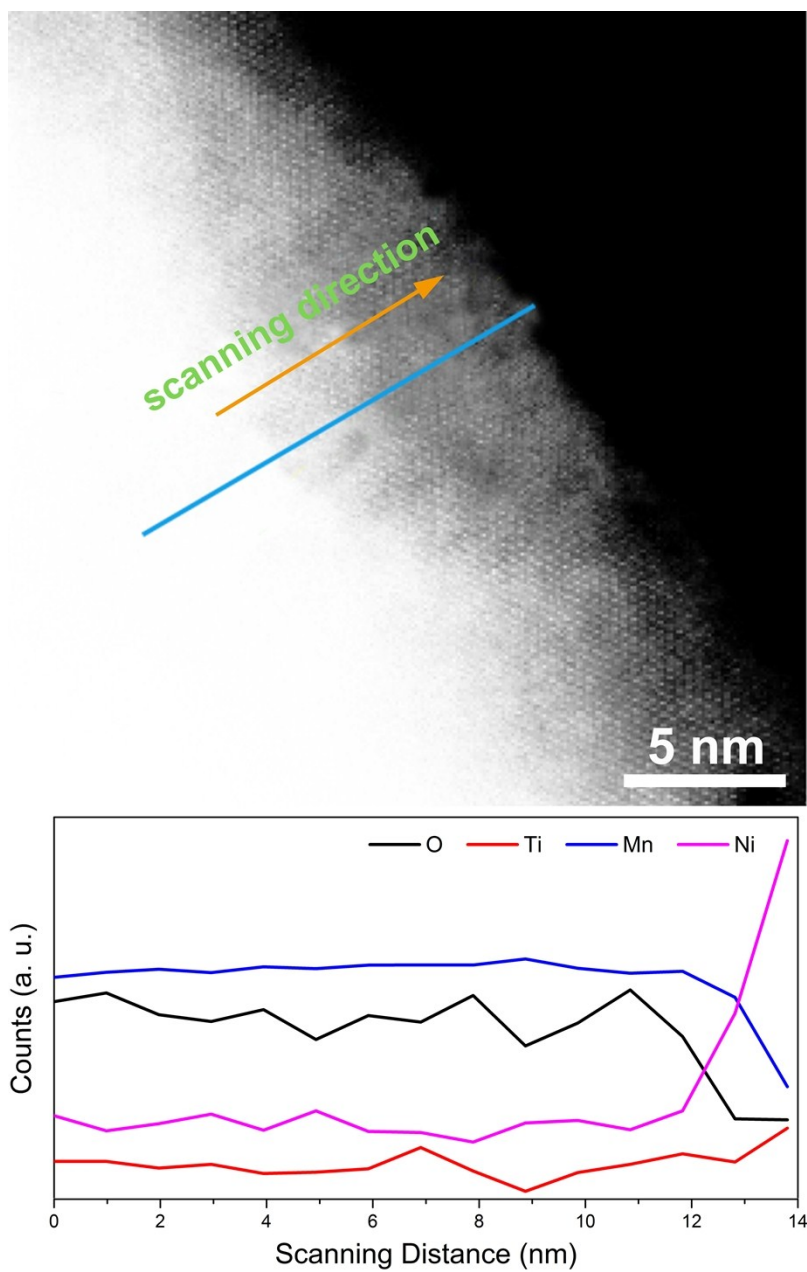

**Figure S3.** STEM-EDS of TiO<sub>2</sub>-LNMO showing concentraton profile of O, Ti, Mn and Ni.

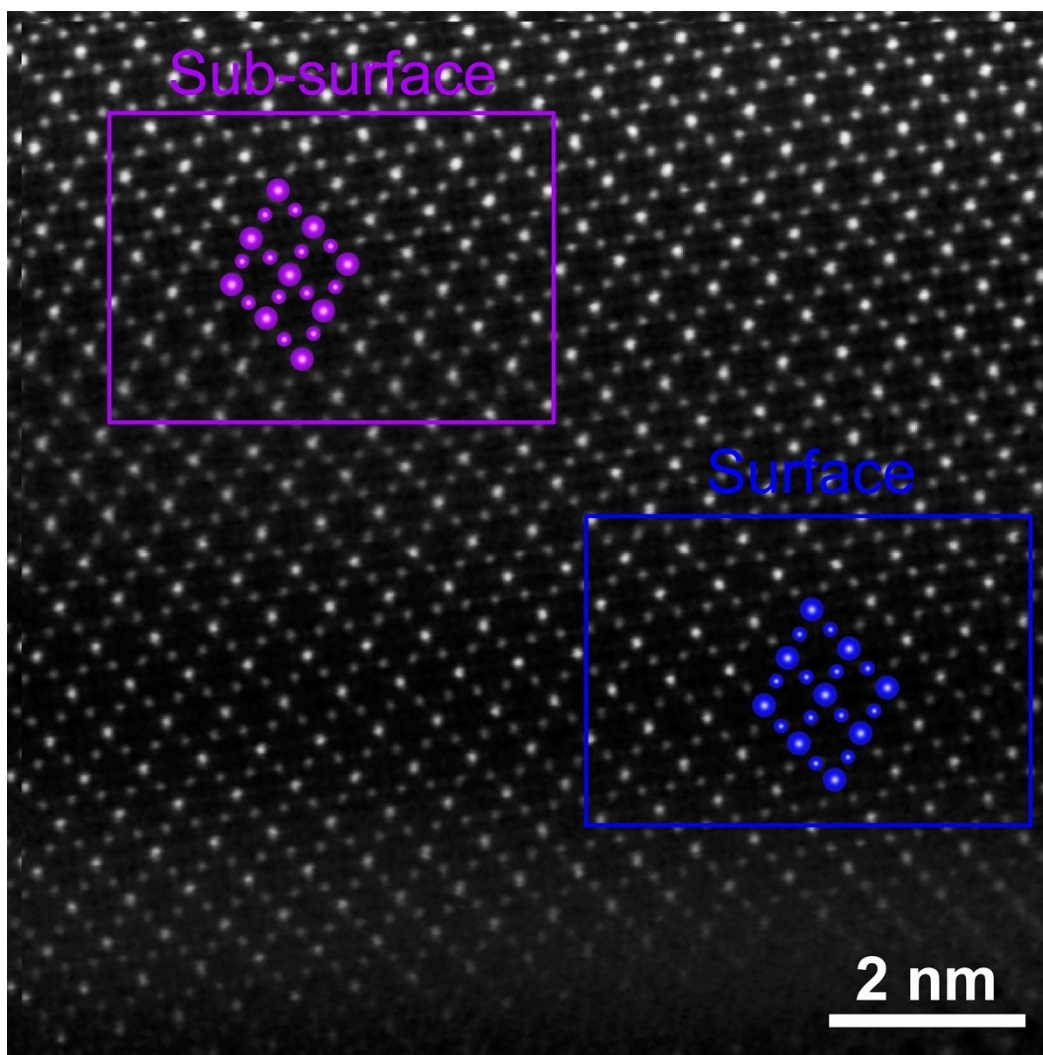

**Figure S4.** STEM HAADF images of TiO<sub>2</sub>-LNMO processed at 500 °C showing no surface structural reconstruction.

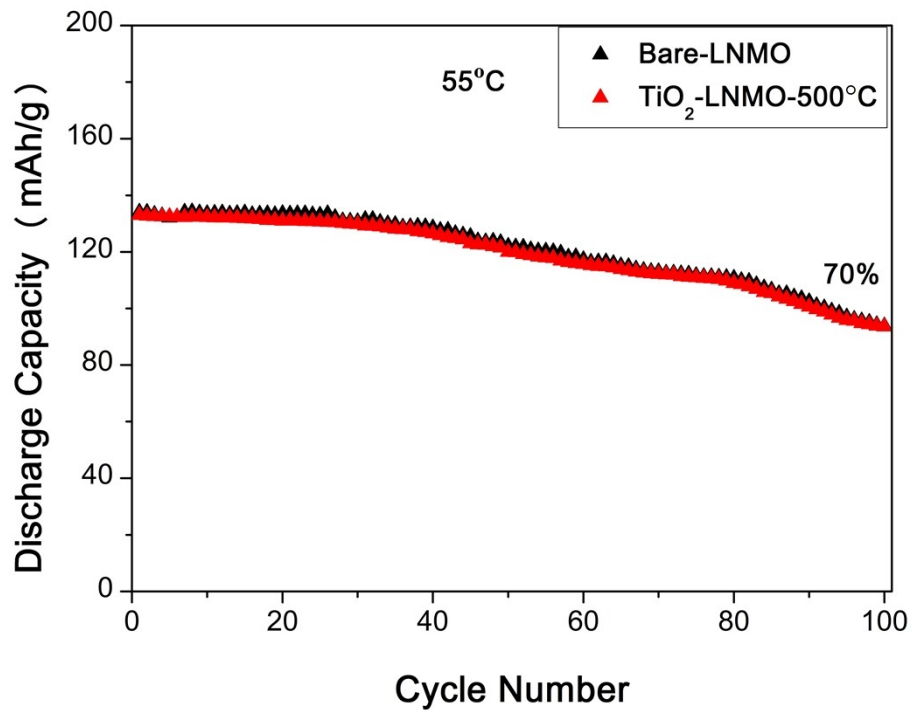

**Figure S5.** Electrochemical cycling performance of Bare-LNMO and TiO<sub>2</sub>-modified LNMO (processed at 500 °C) at 55 °C.

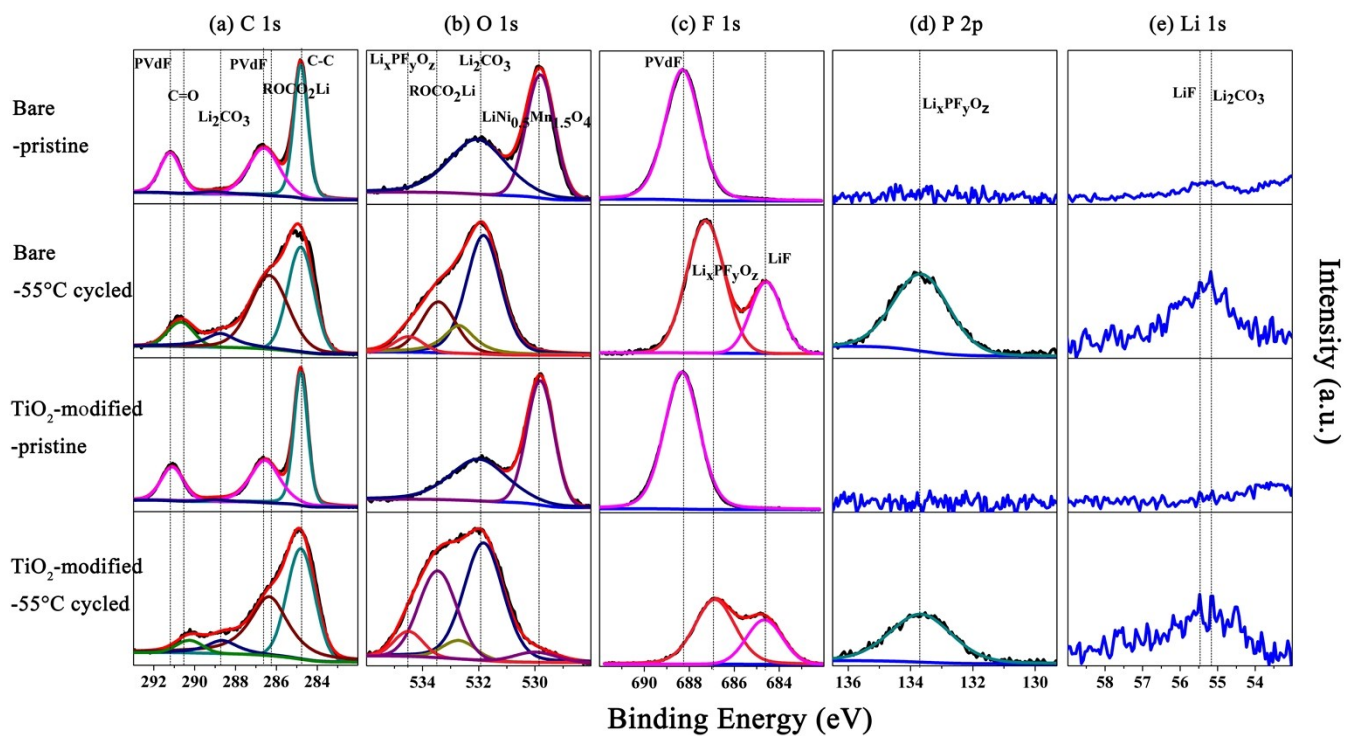

**Figure S6.** Ex-situ XPS results of bare and TiO<sub>2</sub>-coated LNMO electrodes before and after cycling at 55 °C for 100 cycles. The signals for C 1s, O 1s, F 1s, P 2p and Li 1s are shown in (a), (b), (c), (d) and (e), respectively.
